# Supplementary material
Source: Springer Nature journal article supplement (https://www.springermedizin.de/resource/supplementary/12885_2012_3342_MOESM8_ESM.pdf/9463276)

**a**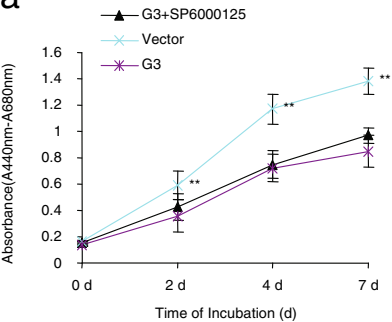**b**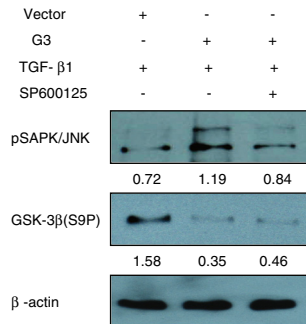**c**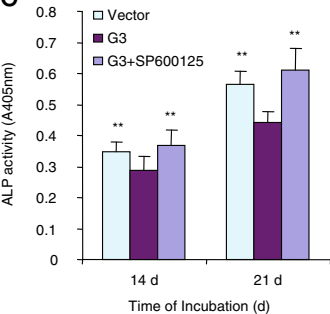**d**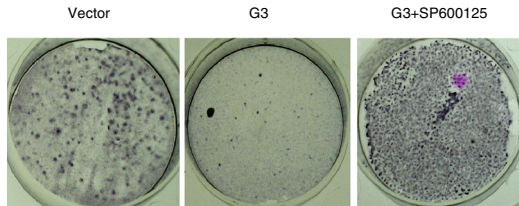

Supplement: MOESM8 [file 9463276]
